# Supplementary material for: Green Coffee Extract Improves Cardiometabolic Parameters and Modulates Gut Microbiota in High-Fat-Diet-Fed ApoE-/- Mice
Source: PubMed Central journal article supplement (PMC6470615; doi:10.3390/nu11030497), 2019-02-27
Supplement: nutrients-11-00497-s001.pdf [file nutrients-11-00497-s001.pdf]

## Supplementary material

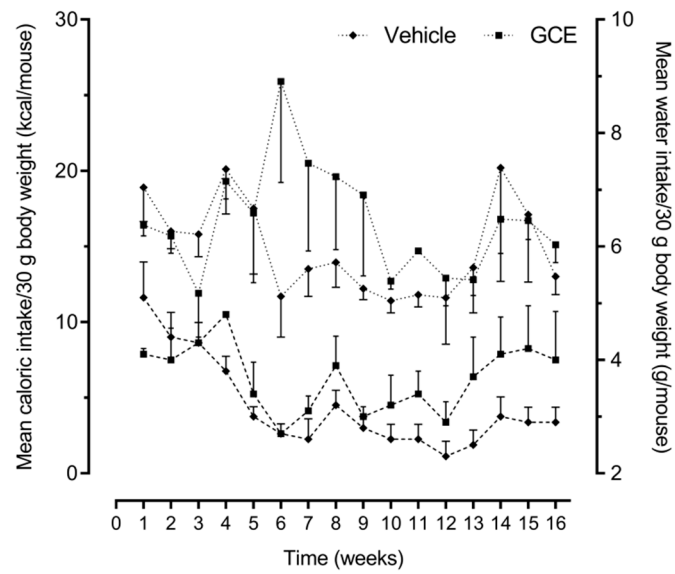

**Figure S1.** Average intake of calories (dotted line, left Y axis) and water (dashed lines, right Y axis), adjusted for mean body weight and measured over a 20 h window as the difference in the weight between the food/water put into the cage and the remaining food/water at the end of the observation period. Data are expressed as the mean  $\pm$  SEM.

**Table S1.** Mass spectral parameters used for catecholamine and metanephrine analyses.

| Compound                 | RT (min) | MRM transitions (m/z) | Cone voltage (V) | Collision energy (V) |
|--------------------------|----------|-----------------------|------------------|----------------------|
| Dopamine (u)             | 1.32     | 154→91*               | 22               | 20                   |
|                          |          | 154→119               | 22               | 18                   |
| Dopamine-d4 (s)          | 1.32     | 158.01→94.72          | 22               | 30                   |
| 3-Methoxytyramine (u)    | 0.89     | 168.1→91*             | 22               | 24                   |
|                          |          | 168.1→119             | 22               | 18                   |
| 3-Methoxytyramine-d4 (s) | 0.89     | 172.03→94.90          | 20               | 34                   |
| Norepinephrine (u)       | 2.12     | 170→152*              | 14               | 6                    |
|                          |          | 170→107               | 14               | 20                   |
| Norepinephrine-d6 (s)    | 2.10     | 176.03→158.07         | 16               | 10                   |
| Epinephrine (u)          | 1.54     | 184.1→166*            | 20               | 8                    |
|                          |          | 184.1→107.0           | 20               | 20                   |
| Epinephrine-d6 (s)       | 1.54     | 190.04→172.03         | 20               | 18                   |
| Normetanephrine (u)      | 1.24     | 184.1→166*            | 20               | 8                    |
|                          |          | 184.1→134.1           | 12               | 18                   |
| Normetanephrine-d3 (s)   | 1.24     | 187.02→169.07         | 14               | 10                   |
| Metanephrine (u)         | 0.97     | 198.1→180*            | 18               | 8                    |
|                          |          | 198.1→165.1           | 18               | 18                   |
| Metanephrine-d3 (s)      | 0.97     | 201.03→183.03         | 18               | 16                   |

(u): compounds detected in urine samples (s): spiked at 80 ng/mL in urine samples. \*SRM was used for quantification purposes

**Table S2.** Histological analysis scores for steatosis and fibrosis in the liver.

| Lipid content assessment (Oil Red O) |                       |              | Fibrosis assessment (Picrosirius Red) |                                 |              |
|--------------------------------------|-----------------------|--------------|---------------------------------------|---------------------------------|--------------|
| <i>Parameter</i>                     | <i>Stage</i>          | <i>Score</i> | <i>Parameter</i>                      | <i>Stage</i>                    | <i>Score</i> |
|                                      | Absent                | 0            |                                       | No fibrosis                     | 0            |
| Vacuolization                        | Small and scattered   | 1            | Periportal                            | Scattered (incomplete lamellae) | 1            |
|                                      | Abundant              | 2            |                                       | Fibrosis (complete lamellae)    | 2            |
|                                      |                       |              |                                       | Portal-portal septa             | 3            |
| Lipid inclusions size                | Absent                | 0            | Perisinusoidal                        | No fibrosis                     | 0            |
|                                      | Microvesicles         | 1            |                                       | Mild (5-50%)                    | 1            |
|                                      | Intermediate-vesicles | 2            |                                       | Severe (>50%)                   | 2            |
|                                      | Macrovesicles         | 3            |                                       |                                 |              |
| Area                                 | < 5%                  | 0            |                                       |                                 |              |
|                                      | 25%                   | 1            |                                       |                                 |              |
|                                      | 50%                   | 2            |                                       |                                 |              |
|                                      | 75%                   | 3            |                                       |                                 |              |
|                                      | >75%                  | 4            |                                       |                                 |              |

**Table S3.** GC/MS analysis conditions for free fatty acids, triglycerides and total cholesterol in liver samples

|                     | <b>Free fatty acids</b>                                                                                                                   | <b>Triglycerides</b>                                                                                         | <b>Cholesterol</b>                                                                                                                                                                                                                             |
|---------------------|-------------------------------------------------------------------------------------------------------------------------------------------|--------------------------------------------------------------------------------------------------------------|------------------------------------------------------------------------------------------------------------------------------------------------------------------------------------------------------------------------------------------------|
| Sample preparation: | 50 $\mu$ L of pyridine + 50 $\mu$ L of BSTFA 70°C for 2 h, injected directly                                                              | Dissolved in 100 $\mu$ L of hexane                                                                           | Dissolved in 100 $\mu$ L of hexane                                                                                                                                                                                                             |
| Column:             | Capillary column HP5; 30 m, 0.25 mm i.d., film thickness 0.25 $\mu$ m, J&W Scientific                                                     | Capillary column CPTAB Triglyceride analysis; 25 m, 0.25 mm i.d., film thickness 0.1 $\mu$ m, J&W Scientific | Capillary column HP5; 30 m, 0.25 mm i.d., film thickness 0.25 $\mu$ m, J&W Scientific                                                                                                                                                          |
| Injection inlet     | 280°C, 1 $\mu$ L                                                                                                                          | 380°C, 1 $\mu$ L                                                                                             | 280°C, 1 $\mu$ L                                                                                                                                                                                                                               |
| Oven:               | 120°C (5 min), 180°C (7°C/min, 5 min), 200°C (10°C/min, 5 min), 300° (10°C/min, 5 min), 310°C (10°C/min, 5 min)                           | 180°C (1 min), 350°C (8°C/min, 1 min), 360°C (2°C/min, 4 min).                                               | 240°C (1 min), 310°C (15°C/min, 5 min)                                                                                                                                                                                                         |
| Carrier:            | Helium, 1 mL/min                                                                                                                          | Carrier: Hydrogen, 1 ml /min                                                                                 | Carrier: Helium, 1 ml /min                                                                                                                                                                                                                     |
| Detection:          | Mass selective detector (MS) Ionization chamber: 230°C Quadrupole: 150°C 7.40 scan <sup>-1</sup> , 40–700 m/z Ionization energy 70 eV     | Flame Ionization Detector (FID)                                                                              | MS/SIM ions (Single Ion Monitoring) Ionization chamber: 230°C Quadrupole: 150°C Ionization energy 70 eV SIM Cholesterol Ions: 145 (quantifier) and 275, 255, and 105 (identifier) SIM ISTD ions: 314(quantifier) and 145 and 105 (identifier). |
| Quantitation:       | C19:0 standard (5-200 $\mu$ g/mL) response factor; Signal deconvoluted for identification and quantitation by NIST AMDIS V. 2.68 software | Response factors of cocoa butter triglycerides standard (5-30 $\mu$ g/mL).                                   | Cholesterol standard (150-500 $\mu$ g/mL).                                                                                                                                                                                                     |

**Table S4.** Triglycerides, free fatty acids and total cholesterol in liver samples

| Triglycerides (mg/g) | Vehicle       | GCE             | Free fatty acids and cholesterol (mg/g) | Vehicle     | GCE         |
|----------------------|---------------|-----------------|-----------------------------------------|-------------|-------------|
| PPP                  | 0.32 ± 0.15   | 0.23 ± 0.07     | Myristic acid                           | 0.09 ± 0.01 | 0.10 ± 0.01 |
| MOP                  | 1.62 ± 1.24   | 0.82 ± 0.64     | Pentadecanoic acid                      | 0.03 ± 0.01 | 0.04 ± 0.00 |
| PPS                  | 6.98 ± 2.76   | 2.50 ± 1.17*    | Palmitoleic acid                        | 0.51 ± 0.15 | 0.30 ± 0.10 |
| POP                  | 6.66 ± 3.11   | 6.68 ± 2.67     | Palmitic acid                           | 1.45 ± 0.33 | 1.58 ± 0.21 |
| PLP                  | 1.84 ± 1.41   | 1.07 ± 0.69     | Linoleic acid                           | 0.17 ± 0.04 | 0.17 ± 0.04 |
| PSS                  | 5.99 ± 7.70   | 7.70 ± 2.77     | Oleic acid                              | 2.62 ± 0.31 | 2.23 ± 0.36 |
| POS                  | 15.92 ± 10.47 | 8.84 ± 4.33***  | Elaidic acid                            | 0.63 ± 0.69 | 0.33 ± 0.06 |
| POO                  | 6.20 ± 7.28   | 0.41 ± 0.24**   | Stearic acid                            | 0.37 ± 0.07 | 0.50 ± 0.08 |
| PLS                  | 1.72 ± 1.04   | 0.65 ± 0.35     | Arachidonic acid                        | 0.14 ± 0.06 | 0.12 ± 0.05 |
| PLO                  | 0.61 ± 0.22   | 0.47 ± 0.21     | Eicosatrienoic acid                     | 0.03 ± 0.01 | 0.03 ± 0.01 |
| SOS                  | 34.30 ± 13.83 | 22.90 ± 10.23** | Eicosadienoic acid                      | 0.07 ± 0.01 | 0.07 ± 0.01 |
| SOO                  | 3.45 ± 2.86   | 1.64 ± 0.79     | <i>cis</i> -11-Eicosenoic acid          | 0.06 ± 0.01 | 0.06 ± 0.01 |
| SLS+OOO              | 5.12 ± 2.81   | 3.88 ± 1.90     | Arachidic acid                          | 0.02 ± 0.01 | 0.02 ± 0.00 |
| SLO                  | 0.91 ± 0.37   | 0.87 ± 0.29     | Docosahexaenoic acid                    | 0.16 ± 0.15 | 0.07 ± 0.05 |
| SOA                  | 6.55 ± 3.74   | 3.84 ± 1.76     | Total FFAs                              | 6.36 ± 0.69 | 5.61 ± 0.67 |
| Total TG             | 98.82 ± 39.30 | 66.99 ± 21.66*  | Total cholesterol                       | 1.94 ± 0.74 | 2.05 ± 0.47 |

PPP: tripalmitin, MOP: 1-margaroyl-2-oleoyl-3-palmitoylglycerol, PPS: 1,2-dipalmitoyl-3-stearoylglycerol, POP: 1,3-dipalmitoyl-2-oleoylglycerol, PLP: 1,3-dipalmitoyl-2-linoleoylglycerol, PSS: 1-palmitoyl-2,3-distearoylglycerol, POS: 1-palmitoyl-2-oleoyl-3-stearoylglycerol, POO: 1-palmitoyl-2,3-dioleoylglycerol, PLS: 1-palmitoyl-2-linoleoyl-3-stearoylglycerol, PLO: 1-palmitoyl-2-linoleoyl-3-oleoylglycerol, SOS: 1,3-distearoyl-2-oleoylglycerol, SOO: 1-stearoyl-2,3-dioleoylglycerol, SLS: 1,3-distearoyl-2-linoleoyl glycerol, OOO: triolein, SLO: 1-stearoyl -2-linoleoyl-3-oleoylglycerol, SOA: 1-stearoyl-2-oleoyl-arachidoylglycerol

\*p<0.05; \*\*p<0.01; \*\*\*p<0.001
